# Supplementary material
Source: PubMed Central journal article supplement (PMC2850229)
Supplement: en.2009-1019_1.pdf [file en.2009-1019_1.pdf]

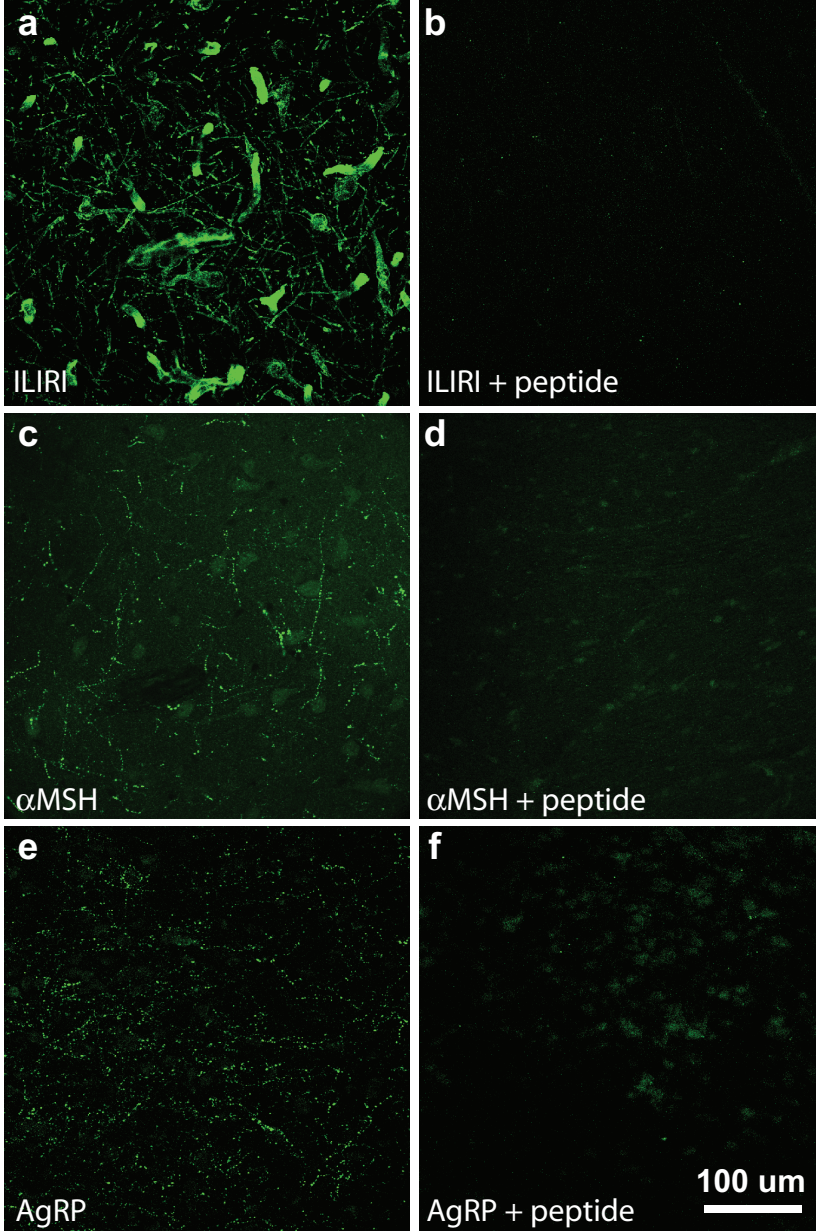

### Supplemental Figure 1

Preabsorption of antisera with control peptide.

(a) Confocal fluorescent image of ILIRI-ir at 25x. (b) Confocal image of ILIRI-ir preabsorbed with control peptide (c) Confocal fluorescent image of αMSH-ir at 25x. (d) Confocal image of αMSH-ir preabsorbed with control peptide (e) Confocal fluorescent image of αMSH-ir at 25x (f) Confocal image of AgRP-ir preabsorbed with control peptide

---

Hypothalamic mRNA expression by RT-PCR in G130 fetuses

---

|       | <b>mCTR</b>  | <b>mHFD</b>  | <i>p</i> value |
|-------|--------------|--------------|----------------|
| BDNF  | 1.90 ± 0.35  | 4.27 ± 1.13  | 0.10           |
| CART  | 0.22 ± 0.05  | 0.32 ± 0.07  | 0.33           |
| GLUT1 | 0.98 ± 0.31  | 1.45 ± 0.11  | 0.13           |
| IGF1R | 0.99 ± 0.09  | 1.04 ± 0.03  | 0.20           |
| INSR  | 1.11 ± 0.13  | 1.90 ± 0.33  | 0.08           |
| IRS1  | 0.48 ± 0.12  | 0.42 ± 0.05  | 0.60           |
| IRS2  | 1.19 ± 0.08  | 1.51 ± 0.11  | 0.22           |
| LEPR  | 1.54 ± 0.40  | 1.48 ± 0.16  | 0.86           |
| MOR   | 0.58 ± 0.08  | 0.90 ± 0.22  | 0.24           |
| NPY1R | 0.21 ± 0.021 | 0.19 ± 0.034 | 0.67           |
| SOCS3 | 0.65 ± 0.09  | 1.14 ± 0.30  | 0.25           |
| UCP2  | 0.84 ± 0.11  | 1.23 ± 0.14  | 0.07           |
| VEGF  | 3.27 ± 0.19  | 5.37 ± 1.16  | 0.13           |

---

Supplemental Table 1. Hypothalamic mRNA expression by RT-PCR in G130 fetuses. Values are mean +/- SEM (n=4-7).

| Target      | Alternate | mCTR          | mDR           | <i>p value</i> |
|-------------|-----------|---------------|---------------|----------------|
| C5a         |           | 11.91 ± 1.30  | 12.86 ± 2.130 | 0.71           |
| CD40 Ligand | CD154     | 10.24 ± 1.08  | 12.75 ± 1.45  | 0.21           |
| G-CSF       | CSFβ      | 10.21 ± 0.78  | 11.87 ± 1.21  | 0.3            |
| GM-CSF      | CSFα      | 9.47 ± 0.50   | 11.53 ± 1.07  | 0.13           |
| GROα        | CXCL1     | 12.03 ± 0.83  | 13.92 ± 1.99  | 0.42           |
| I-309       | CCL1      | 9.43 ± 0.70   | 11.57 ± 1.44  | 0.23           |
| IFNγ        |           | 9.12 ± 0.75   | 12.13 ± 2.03  | 0.21           |
| IL-1α       | IL-1F1    | 9.70 ± 1.76   | 11.27 ± 2.05  | 0.57           |
| IL-1β       | IL-1F2    | 10.14 ± 1.64  | 12.02 ± 1.46  | 0.43           |
| IL-1ra      | IL-1F3    | 14.59 ± 0.82  | 13.50 ± 1.08  | 0.45           |
| IL-2        |           | 9.10 ± 0.44   | 10.95 ± 1.11  | 0.17           |
| IL-4        |           | 9.04 ± 0.70   | 10.93 ± 1.26  | 0.24           |
| IL-5        |           | 8.41 ± 0.69   | 10.70 ± 1.39  | 0.19           |
| IL-6        |           | 8.85 ± 0.59   | 10.89 ± 1.78  | 0.32           |
| IL-8        | CXCL8     | 15.81 ± 3.49  | 13.20 ± 2.77  | 0.58           |
| IL-10       |           | 9.61 ± 1.53   | 9.611 ± 1.53  | 0.51           |
| IL-12 p70   |           | 9.37 ± 1.04   | 12.14 ± 1.40  | 0.16           |
| IL-13       |           | 12.72 ± 0.89  | 14.63 ± 1.04  | 0.21           |
| IL-16       | LCF       | 9.46 ± 0.49   | 11.78 ± 1.21  | 0.13           |
| IL-17       |           | 9.15 ± 0.56   | 11.35 ± 1.19  | 0.14           |
| IL-17E      |           | 9.04 ± 0.57   | 11.04 ± 1.24  | 0.19           |
| IL-23       |           | 9.14 ± 0.58   | 11.58 ± 1.68  | 0.22           |
| IL-27       |           | 9.86 ± 1.04   | 11.59 ± 2.33  | 0.52           |
| IL-32α      |           | 10.49 ± 1.75  | 11.92 ± 1.50  | 0.56           |
| IP-10       | CXCL10    | 9.43 ± 0.96   | 12.43 ± 1.35  | 0.12           |
| I-TAC       | CXCL11    | 10.61 ± 0.19  | 11.93 ± 1.13  | 0.29           |
| MCP-1       | CCL2      | 9.16 ± 0.71   | 11.67 ± 1.03  | 0.09           |
| MIF         | GIF       | 57.50 ± 3.97  | 59.25 ± 7.79  | 0.85           |
| MIP-1α      | CCL3      | 9.34 ± 0.75   | 11.40 ± 0.92  | 0.13           |
| MIP-1β      | CCL4      | 8.78 ± 0.61   | 11.26 ± 1.70  | 0.22           |
| RANTES      | CCL5      | 51.84 ± 17.34 | 54.19 ± 16.12 | 0.92           |
| SDF-1       | CXCL12    | 10.53 ± 1.27  | 13.18 ± 1.81  | 0.28           |
| Serpin E1   | PAI-1     | 39.02 ± 9.99  | 28.21 ± 4.72  | 0.37           |
| sICAM-1     | CD54      | 8.74 ± 0.69   | 11.25 ± 1.68  | 0.22           |
| sTREM-1     |           | 8.96 ± 0.65   | 11.40 ± 1.06  | 0.1            |
| TNFα        | TNFSF1A   | 9.49 ± 0.71   | 11.79 ± 1.11  | 0.13           |

Supplemental Table 2. Circulating cytokines in G130 mDR compared to mCTR. The fold-change for each gene was calculated as  $2^{(-Ct)}$ , where  $Ct = Ct(\text{mHFD group}) - Ct(\text{mCTR group})$ . (n=4).
